# Supplementary material for: Familial Risks between Pernicious Anemia and Other Autoimmune Diseases in the Population of Sweden
Source: Autoimmune Dis. 2021 Jan 12;2021:8815297. doi: 10.1155/2021/8815297 (PMC7815416; doi:10.1155/2021/8815297)

FAMILIAL RISKS BETWEEN PERNICIOUS ANEMIA AND OTHER AUTOIMMUNE DISEASES IN THE POPULATION OF SWEDEN

**SUPPLEMENTARY MATERIAL**

Xinjun Li1, Hauke Thomsen1,2,9, Kristina Sundquist1,3,4, Jan Sundquist1,3,4, Asta Försti1,2,5,6, Kari Hemminki1,2,7,8

1Center for Primary Health Care Research, Lund University, Malmö, Sweden;

2Division of Molecular Genetic Epidemiology, German Cancer Research Centre (DKFZ), 69120 Heidelberg, Germany;

3Department of Family Medicine and Community Health, Department of Population Health Science and Policy, Icahn School of Medicine at Mount Sinai, New York, USA

4Center for Community-based Healthcare Research and Education (CoHRE), Department of Functional Pathology, School of Medicine, Shimane University, Japan

5Hopp Children's Cancer Center (KiTZ), Heidelberg, Germany

6Division of Pediatric Neurooncology, German Cancer Research Center (DKFZ), German Cancer Consortium (DKTK), Heidelberg, Germany

7Division of Cancer Epidemiology, German Cancer Research Centre (DKFZ), 69120 Heidelberg, Germany;

8Faculty of Medicine and Biomedical Center in Pilsen, Charles University in Prague, 30605 Pilsen, Czech Republic

9Genewerk GmbH, Heidelberg, Germany

Corresponding Author: Hauke Thomsen,

GeneWerk GmbH, Im Neuenheimer Feld 582, D-69120 Heidelberg, Germany

Phone: +49 (0) 6221 42790-24

Fax: +49 (0) 6221 42790-12

hauke.thomsen@genewerk.de

**Supplementary Table 1: Hospitalizations for autoimmune disorders in Sweden,**

**1964-2015**

|  |  | Hospitalizations | |
| --- | --- | --- | --- |
| **Autoimmune condition** |  | No. | % |
| Addison’s disease |  | 3213 | 0.4 |
| Amyotrophic lateral sclerosis |  | 10,817 | 1.2 |
| Angiitis hypersensitiva |  | 359 | 0.0 |
| Ankylosing spondylitis |  | 17,206 | 1.9 |
| Autoimmune hemolytic anemia |  | 1461 | 0.2 |
| Behçet’s disease |  | 935 | 0.1 |
| Celiac disease |  | 45,886 | 5.1 |
| Chorea minor |  | 160 | 0.0 |
| Chronic rheumatic heart disease |  | 24,656 | 2.8 |
| Crohn’s disease |  | 41,627 | 4.6 |
| Dermatitis Herpetiformis |  | 2466 | 0.3 |
| Diabetes mellitus type I |  | 29,854 | 3.3 |
| Discoid lupus erythematosus |  | 3891 | 0.4 |
| Giant-cell arteritis |  | 15,946 | 1.8 |
| Glomerular nephritis acute |  | 17,958 | 2.0 |
| Glomerular nephritis chronic |  | 8593 | 1.0 |
| Graves’ disease |  | 60,673 | 6.8 |
| Guillain-Barré syndrome |  | 4558 | 0.5 |
| Hashimoto’s thyroiditis |  | 52,271 | 5.8 |
| Immune thrombocytopenic purpura |  | 12911 | 1.4 |
| Localized scleroderma |  | 3282 | 0.4 |
| Lupoid hepatitis |  | 6856 | 0.8 |
| Multiple sclerosis |  | 29,263 | 3.3 |
| Myasthenia gravis |  | 4579 | 0.5 |
| Pemphigoid |  | 8071 | 0.9 |
| Pemphigus |  | 1639 | 0.2 |
| Pernicious anemia |  | 35,906 | 4.0 |
| Polyarteritis nodosa |  | 1722 | 0.2 |
| Polymyalgia rheumatica |  | 40,697 | 4.5 |
| Polymyositis/dermatomyositis |  | 2974 | 0.3 |
| Primary biliary cirrhosis |  | 4761 | 0.5 |
| Psoriasis |  | 150,979 | 16.8 |
| Reiter’s disease |  | 1612 | 0.2 |
| Rheumatic fever |  | 4197 | 0.5 |
| Rheumatoid arthritis |  | 121,723 | 13.6 |
| Sarcoidosis |  | 23,847 | 2.7 |
| Sjögren’s syndrome |  | 11,091 | 1.2 |
| Systemic lupus erythematosus |  | 10,198 | 1.1 |
| Systemic sclerosis |  | 3753 | 0.4 |
| Takayasus disease |  | 423 | 0.0 |
| Thrombotic thrombocytopenic purpura |  | 499 | 0.1 |
| Ulcerative colitis |  | 69,428 | 7.7 |
| Wegener’s granulomatosis |  | 3329 | 0.4 |
| All above |  | 896,270 | 100.0 |

| **Supplementary Table 2: Familial risks for pernicious anemia with disconcordant autoimmune diseases which did not reach statistical signifcance** | | | | | | | | | | | | | | | |
| --- | --- | --- | --- | --- | --- | --- | --- | --- | --- | --- | --- | --- | --- | --- | --- |
| Subtypes of AID in offspring | Family history of AID | Both genders | | | |  | Men | | | |  | Women | | | |
|  |  | Obs. | SIR | 95% CI | |  | Obs. | SIR | 95% CI | |  | Obs. | SIR | 95% CI | |
| **Pernicious anemia** | Amyotrophic lateral sclerosis | 24 | 0.88 | 0.57 | 1.32 |  | 7 | 0.61 | 0.24 | 1.26 |  | 17 | 1.08 | 0.63 | 1.74 |
| Amyotrophic lateral sclerosis | **Pernicious anemia** | 39 | 0.96 | 0.68 | 1.31 |  | 26 | 1.03 | 0.67 | 1.52 |  | 13 | 0.84 | 0.44 | 1.43 |
|  |  |  |  |  |  |  |  |  |  |  |  |  |  |  |  |
| **Pernicious anemia** | Angiitis hypersensitive | 3 | 4.17 | 0.79 | 12.35 |  | 1 | 3.44 | 0.00 | 19.72 |  | 2 | 4.67 | 0.44 | 17.18 |
| Angiitis hypersensitive | **Pernicious anemia** | 2 | 1.35 | 0.13 | 4.97 |  | 0 |  |  |  |  | 2 | 2.37 | 0.22 | 8.71 |
|  |  |  |  |  |  |  |  |  |  |  |  |  |  |  |  |
| **Pernicious anemia** | Ankylosing spondylitis | 33 | 0.98 | 0.67 | 1.38 |  | 9 | 0.75 | 0.34 | 1.44 |  | 24 | 1.11 | 0.71 | 1.65 |
| Ankylosing spondylitis | **Pernicious anemia** | 80 | 0.89 | 0.70 | 1.10 |  | 51 | 0.82 | 0.61 | 1.08 |  | 29 | 1.02 | 0.68 | 1.46 |
|  |  |  |  |  |  |  |  |  |  |  |  |  |  |  |  |
| **Pernicious anemia** | Autoimmune hemolytic anemia | 2 | 0.70 | 0.07 | 2.58 |  | 1 | 0.82 | 0.00 | 4.71 |  | 1 | 0.61 | 0.00 | 3.52 |
| Autoimmune hemolytic anemia | **Pernicious anemia** | 6 | 1.90 | 0.68 | 4.15 |  | 5 | 3.31 | 1.04 | 7.78 |  | 1 | 0.60 | 0.00 | 3.47 |
|  |  |  |  |  |  |  |  |  |  |  |  |  |  |  |  |
| **Pernicious anemia** | Behcet disease | 0 |  |  |  |  | 0 |  |  |  |  | 0 |  |  |  |
| Behcet disease | **Pernicious anemia** | 10 | 2.60 | 1.24 | 4.80 |  | 4 | 2.47 | 0.64 | 6.39 |  | 6 | 2.70 | 0.97 | 5.90 |
|  |  |  |  |  |  |  |  |  |  |  |  |  |  |  |  |
| **Pernicious anemia** | Chorea minor | 0 |  |  |  |  | 0 |  |  |  |  | 0 |  |  |  |
| Chorea minor | **Pernicious anemia** | 0 |  |  |  |  | 0 |  |  |  |  | 0 |  |  |  |
|  |  |  |  |  |  |  |  |  |  |  |  |  |  |  |  |
| **Pernicious anemia** | Chronic rheumatic heart disease | 59 | 1.13 | 0.86 | 1.46 |  | 24 | 1.04 | 0.67 | 1.56 |  | 35 | 1.20 | 0.84 | 1.67 |
| Chronic rheumatic heart disease | **Pernicious anemia** | 31 | 0.85 | 0.58 | 1.21 |  | 19 | 0.90 | 0.54 | 1.41 |  | 12 | 0.78 | 0.40 | 1.36 |
|  |  |  |  |  |  |  |  |  |  |  |  |  |  |  |  |
| **Pernicious anemia** | Dermatitis herpetiformis | 9 | 1.63 | 0.74 | 3.10 |  | 3 | 1.29 | 0.24 | 3.83 |  | 6 | 1.87 | 0.67 | 4.09 |
| Dermatitis herpetiformis | **Pernicious anemia** | 12 | 1.02 | 0.53 | 1.79 |  | 7 | 1.06 | 0.42 | 2.20 |  | 5 | 0.98 | 0.31 | 2.30 |
|  |  |  |  |  |  |  |  |  |  |  |  |  |  |  |  |
| **Pernicious anemia** | Discoid lupus erythematosus | 10 | 1.06 | 0.50 | 1.95 |  | 2 | 0.58 | 0.05 | 2.13 |  | 8 | 1.33 | 0.57 | 2.64 |
| Discoid lupus erythematosus | **Pernicious anemia** | 27 | 1.27 | 0.83 | 1.85 |  | 10 | 1.78 | 0.85 | 3.28 |  | 17 | 1.08 | 0.63 | 1.74 |
|  |  |  |  |  |  |  |  |  |  |  |  |  |  |  |  |
| **Pernicious anemia** | Glomerular nephritis chronic | 31 | 0.88 | 0.60 | 1.26 |  | 9 | 0.64 | 0.29 | 1.22 |  | 22 | 1.05 | 0.66 | 1.59 |
| Glomerular nephritis chronic | **Pernicious anemia** | 72 | 0.97 | 0.76 | 1.22 |  | 51 | 1.04 | 0.77 | 1.36 |  | 21 | 0.83 | 0.51 | 1.27 |
|  |  |  |  |  |  |  |  |  |  |  |  |  |  |  |  |
| **Pernicious anemia** | Glomerular nephritis acute | 13 | 0.84 | 0.44 | 1.44 |  | 5 | 0.87 | 0.27 | 2.04 |  | 8 | 0.82 | 0.35 | 1.62 |
| Glomerular nephritis acute | **Pernicious anemia** | 37 | 0.90 | 0.63 | 1.24 |  | 25 | 0.96 | 0.62 | 1.41 |  | 12 | 0.80 | 0.41 | 1.41 |
|  |  |  |  |  |  |  |  |  |  |  |  |  |  |  |  |
| **Pernicious anemia** | Guillain-Barre Syndrome | 13 | 1.31 | 0.69 | 2.24 |  | 3 | 0.79 | 0.15 | 2.34 |  | 10 | 1.62 | 0.77 | 3.00 |
| Guillain-Barre Syndrome | **Pernicious anemia** | 29 | 1.20 | 0.80 | 1.72 |  | 18 | 1.23 | 0.73 | 1.94 |  | 11 | 1.15 | 0.57 | 2.07 |
|  |  |  |  |  |  |  |  |  |  |  |  |  |  |  |  |
| **Pernicious anemia** | Immune thrombocytopenic purpura | 22 | 1.02 | 0.64 | 1.55 |  | 10 | 1.23 | 0.59 | 2.27 |  | 12 | 0.90 | 0.46 | 1.57 |
| Immune thrombocytopenic purpura | **Pernicious anemia** | 42 | 0.86 | 0.62 | 1.16 |  | 19 | 0.78 | 0.47 | 1.22 |  | 23 | 0.93 | 0.59 | 1.40 |
|  |  |  |  |  |  |  |  |  |  |  |  |  |  |  |  |
| **Pernicious anemia** | Localized scleroderma | 7 | 1.06 | 0.42 | 2.19 |  | 4 | 1.61 | 0.42 | 4.16 |  | 3 | 0.73 | 0.14 | 2.15 |
| Localized scleroderma | **Pernicious anemia** | 14 | 0.80 | 0.43 | 1.34 |  | 5 | 0.95 | 0.30 | 2.23 |  | 9 | 0.73 | 0.33 | 1.39 |
|  |  |  |  |  |  |  |  |  |  |  |  |  |  |  |  |
| **Pernicious anemia** | Lupoid hepatitis | 15 | 0.97 | 0.54 | 1.60 |  | 8 | 1.33 | 0.57 | 2.63 |  | 7 | 0.74 | 0.29 | 1.53 |
| Lupoid hepatitis | **Pernicious anemia** | 33 | 1.00 | 0.69 | 1.41 |  | 13 | 0.95 | 0.50 | 1.63 |  | 20 | 1.04 | 0.63 | 1.60 |
|  |  |  |  |  |  |  |  |  |  |  |  |  |  |  |  |
| **Pernicious anemia** | Multiple sclerosis | 58 | 0.96 | 0.73 | 1.25 |  | 23 | 1.03 | 0.65 | 1.55 |  | 35 | 0.93 | 0.65 | 1.29 |
| Multiple sclerosis | **Pernicious anemia** | 188 | 1.14 | 0.98 | 1.31 |  | 59 | 1.10 | 0.84 | 1.42 |  | 129 | 1.16 | 0.97 | 1.37 |
|  |  |  |  |  |  |  |  |  |  |  |  |  |  |  |  |
| **Pernicious anemia** | Myasthenia gravis | 17 | 1.61 | 0.94 | 2.58 |  | 7 | 1.65 | 0.65 | 3.41 |  | 10 | 1.59 | 0.75 | 2.93 |
| Myasthenia gravis | **Pernicious anemia** | 19 | 0.95 | 0.57 | 1.49 |  | 10 | 1.05 | 0.50 | 1.94 |  | 9 | 0.86 | 0.39 | 1.64 |
|  |  |  |  |  |  |  |  |  |  |  |  |  |  |  |  |
| **Pernicious anemia** | Pemphigoid | 15 | 0.94 | 0.53 | 1.56 |  | 4 | 0.59 | 0.15 | 1.52 |  | 11 | 1.21 | 0.60 | 2.17 |
| Pemphigoid | **Pernicious anemia** | 17 | 1.00 | 0.58 | 1.60 |  | 8 | 0.91 | 0.39 | 1.79 |  | 9 | 1.10 | 0.50 | 2.10 |
|  |  |  |  |  |  |  |  |  |  |  |  |  |  |  |  |
| **Pernicious anemia** | Pemphigus | 3 | 1.05 | 0.20 | 3.10 |  | 1 | 0.89 | 0.00 | 5.12 |  | 2 | 1.15 | 0.11 | 4.22 |
| Pemphigus | **Pernicious anemia** | 2 | 0.37 | 0.03 | 1.37 |  | 0 |  |  |  |  | 2 | 0.74 | 0.07 | 2.71 |
|  |  |  |  |  |  |  |  |  |  |  |  |  |  |  |  |
| **Pernicious anemia** | Polyarteritis nodosa | 8 | 2.15 | 0.92 | 4.25 |  | 4 | 2.53 | 0.66 | 6.55 |  | 4 | 1.86 | 0.48 | 4.81 |
| Polyarteritis nodosa | **Pernicious anemia** | 12 | 2.41 | 1.24 | 4.22 |  | 4 | 1.65 | 0.43 | 4.28 |  | 8 | 3.13 | 1.34 | 6.19 |
|  |  |  |  |  |  |  |  |  |  |  |  |  |  |  |  |
| **Pernicious anemia** | Polymyositis/dermatomyositis | 12 | 1.62 | 0.83 | 2.84 |  | 6 | 2.09 | 0.75 | 4.57 |  | 6 | 1.33 | 0.48 | 2.91 |
| Polymyositis/dermatomyositis | **Pernicious anemia** | 15 | 1.03 | 0.57 | 1.70 |  | 6 | 0.95 | 0.34 | 2.08 |  | 9 | 1.09 | 0.50 | 2.08 |
|  |  |  |  |  |  |  |  |  |  |  |  |  |  |  |  |
| **Pernicious anemia** | Primary biliary cirrhosis | 10 | 0.86 | 0.41 | 1.59 |  | 3 | 0.64 | 0.12 | 1.89 |  | 7 | 1.02 | 0.40 | 2.11 |
| Primary biliary cirrhosis | **Pernicious anemia** | 30 | 1.45 | 0.97 | 2.07 |  | 5 | 1.40 | 0.44 | 3.28 |  | 25 | 1.46 | 0.94 | 2.15 |
|  |  |  |  |  |  |  |  |  |  |  |  |  |  |  |  |
| **Pernicious anemia** | Reiter disease | 5 | 1.28 | 0.41 | 3.02 |  | 2 | 1.42 | 0.13 | 5.21 |  | 3 | 1.21 | 0.23 | 3.58 |
| Reiter disease | **Pernicious anemia** | 5 | 0.47 | 0.15 | 1.12 |  | 4 | 0.43 | 0.11 | 1.12 |  | 1 | 0.77 | 0.00 | 4.42 |
|  |  |  |  |  |  |  |  |  |  |  |  |  |  |  |  |
| **Pernicious anemia** | Rheumatic fever | 10 | 1.02 | 0.49 | 1.89 |  | 6 | 1.56 | 0.56 | 3.41 |  | 4 | 0.68 | 0.18 | 1.75 |
| Rheumatic fever | **Pernicious anemia** | 18 | 0.93 | 0.55 | 1.47 |  | 12 | 0.80 | 0.41 | 1.40 |  | 6 | 1.36 | 0.49 | 2.99 |
|  |  |  |  |  |  |  |  |  |  |  |  |  |  |  |  |
| **Pernicious anemia** | Systemic sclerosis | 9 | 0.98 | 0.45 | 1.87 |  | 3 | 0.84 | 0.16 | 2.49 |  | 6 | 1.07 | 0.39 | 2.35 |
| Systemic sclerosis | **Pernicious anemia** | 20 | 1.15 | 0.70 | 1.78 |  | 5 | 1.25 | 0.40 | 2.95 |  | 15 | 1.12 | 0.63 | 1.86 |
|  |  |  |  |  |  |  |  |  |  |  |  |  |  |  |  |
| **Pernicious anemia** | Takayasu disease | 0 |  |  |  |  | 0 |  |  |  |  | 0 |  |  |  |
| Takayasu disease | **Pernicious anemia** | 2 | 0.92 | 0.09 | 3.38 |  | 1 | 1.59 | 0.00 | 9.09 |  | 1 | 0.65 | 0.00 | 3.72 |
|  |  |  |  |  |  |  |  |  |  |  |  |  |  |  |  |
| **Pernicious anemia** | Thrombotic thrombocytop | 1 | 0.99 | 0.00 | 5.66 |  | 1 | 2.78 | 0.00 | 15.96 |  | 0 |  |  |  |
| Thrombotic thrombocytop | **Pernicious anemia** | 1 | 0.48 | 0.00 | 2.75 |  | 1 | 0.98 | 0.00 | 5.61 |  | 0 |  |  |  |
|  |  |  |  |  |  |  |  |  |  |  |  |  |  |  |  |
| **Pernicious anemia** | Wegener granulomatosis | 9 | 1.13 | 0.51 | 2.16 |  | 3 | 0.99 | 0.19 | 2.93 |  | 6 | 1.22 | 0.44 | 2.67 |
| Wegener granulomatosis | **Pernicious anemia** | 19 | 1.08 | 0.65 | 1.69 |  | 9 | 0.88 | 0.40 | 1.67 |  | 10 | 1.37 | 0.65 | 2.53 |

AID=Autoimmune disorders; SIR=Standardized incidence ratio; CI=Confidence interval.

**Supplementary Figure legends**

**Supplementary Figure 1. Age-specific incidence rate (per 100 000 person years) of pernicious anemia in Sweden, 1964-2015**

Total incidence rate (European standardized population) =8.3 per 100 000 person years, males=7.5 per 100 000 person years, and females=9.1 per 100 000 person years.

**Supplementary Figure 2. Age-specific prevalence (per 1000 person years) of pernicious anemia in Sweden in 2010-2015**

Total prevalence (European standardized population) =0.9 per 1000, males=0.8 per 1000, and females=1.1 per 1000.


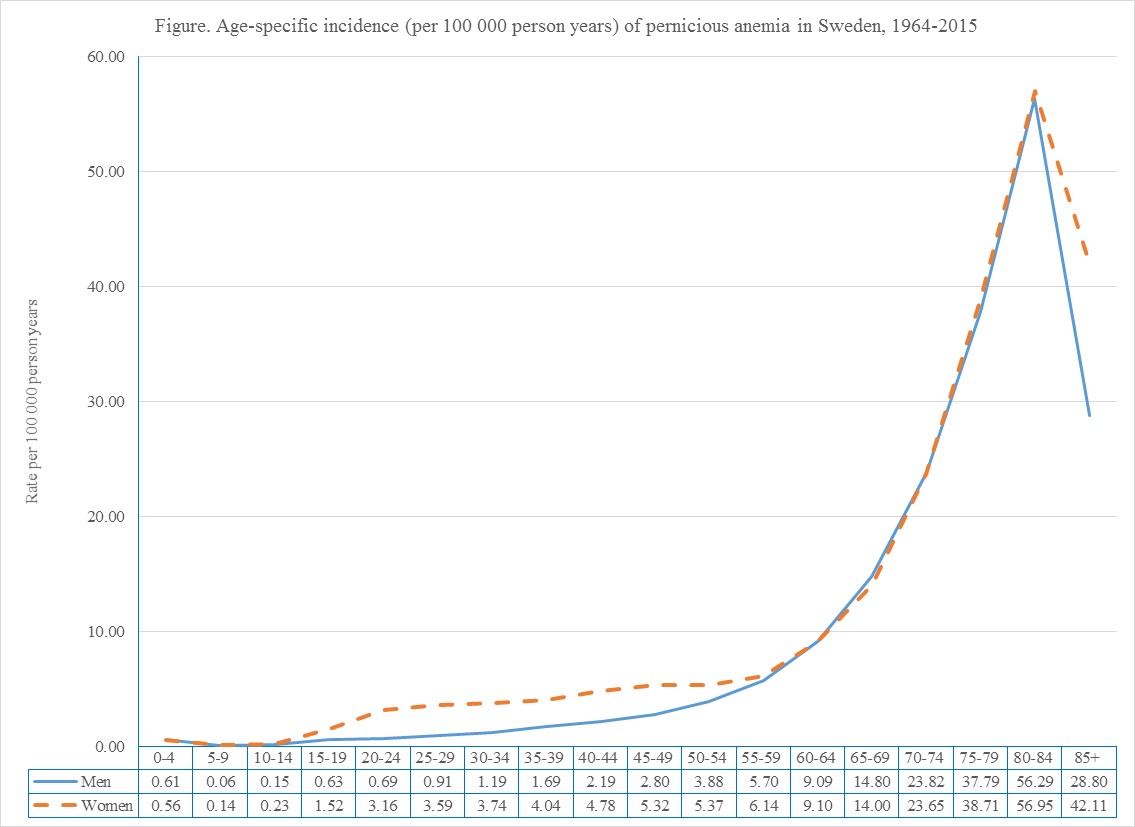


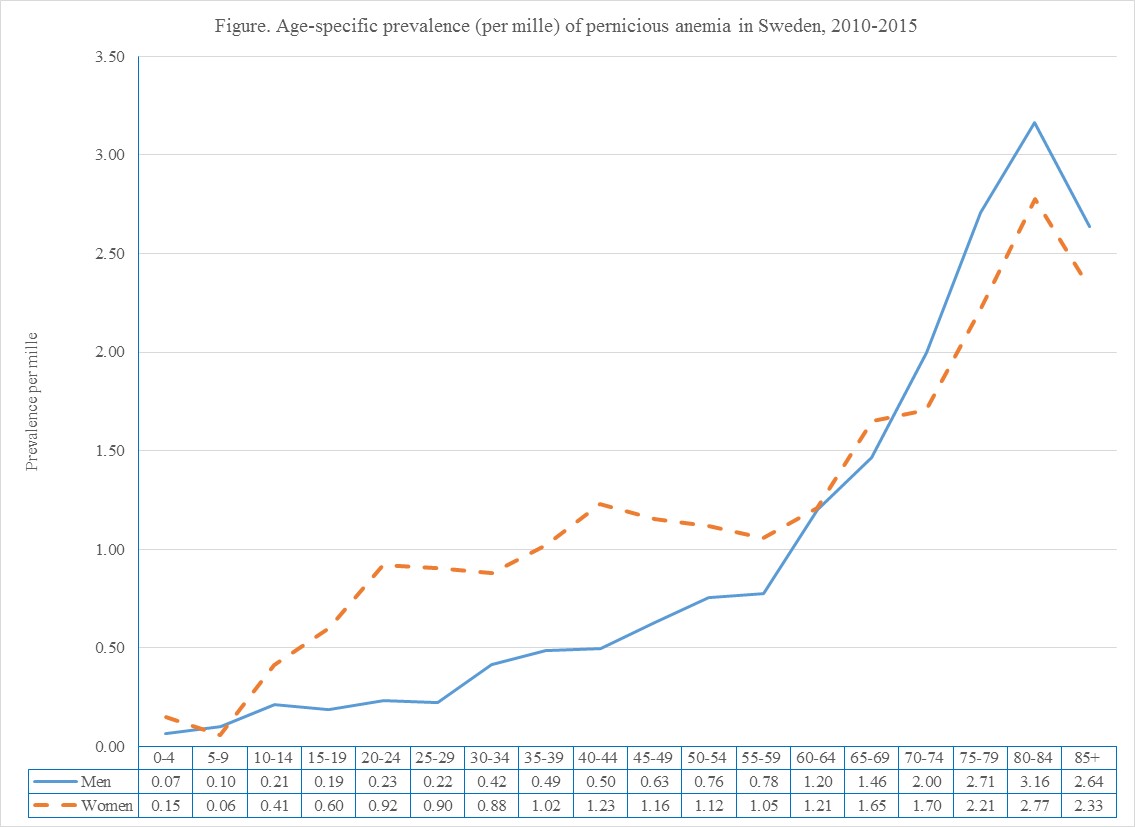

Supplement: Supplementary Materials — Supplementary Figure 1: age-specific incidence rate (per 1, 00, 000 person years) of pernicious anemia in Sweden, 1964–2015. Supplementary Figure 2: age-specific prevalence (per 1000 person years) of pernicious anemia in Sweden in 2010–2015. Supplementary Table 1: hospitalizations for autoimmune disorders in Sweden, 1964–2015. Supplementary Table 2: familial risks for pernicious anemia with discordant autoimmune diseases which did not reach statistical significance. [file 8815297.f1.docx]
